1 **Defective skeletogenesis and oversized otoliths in fish early stages in a changing ocean**

2

3 Marta S. Pimentel<sup>1,2\*</sup>, Filipa Faleiro<sup>1</sup>, Gisela Dionísio<sup>1,3</sup>, Tiago Repolho<sup>1</sup>, Pedro Pousão<sup>4</sup>, Jorge  
4 Machado<sup>2</sup>, Rui Rosa<sup>1</sup>

5

6 Running head: Fish deformities in a changing ocean

7

8

9 <sup>1</sup> Laboratório Marítimo da Guia, Centro de Oceanografia, Faculdade de Ciências da  
10 Universidade de Lisboa, Av. Nossa Senhora do Cabo 939, 2750-374 Cascais, Portugal.

11 <sup>2</sup> Instituto Ciências Biomédicas Abel Salazar, Universidade do Porto, Largo Prof. Abel Salazar  
12 2, 4099-003 Porto, Portugal.

13 <sup>3</sup> Departamento de Biologia & CESAM, Universidade de Aveiro, Campus Universitário de  
14 Santiago, 3810-193 Aveiro, Portugal

15 <sup>4</sup> Instituto Português do Mar e da Atmosfera. Av. 5 de Outubro s/n 8700-305, Olhão, Portugal

16

17

18

19

20 \* Corresponding author: Marta Pimentel. Telephone: +351-214869211. Fax: +351-214869720.

21 E-mail: mcrsilva@fc.ul.pt

22

23

24

25

26

27 **Keywords:** Ocean warming, acidification, fish larvae, ecophysiology, skeletal deformities

28

29

30

31

32

33

34 Early life stages of many marine organisms are being challenged by rising seawater temperature  
35 and CO<sub>2</sub> concentrations, but their physiological responses to these environmental changes still  
36 remain unclear. In the present study, we show that future predictions of ocean warming (+4°C)  
37 and acidification ( $\Delta\text{pH} = 0.5$  units) may compromise the development of early life stages of a  
38 highly commercial teleost fish, *Solea senegalensis*. Exposure to future conditions caused a  
39 decline in hatching success and larval survival. Growth, metabolic rates and thermal tolerance  
40 increased with temperature but decreased under acidified conditions. Hypercapnia and warming  
41 amplified the incidence of deformities by 31.5% (including severe deformities such as lordosis,  
42 scoliosis and kyphosis), while promoting the occurrence of oversized otoliths (109.3%  
43 increase). Smaller larvae with greater skeletal deformities and larger otoliths may face major  
44 ecophysiological challenges, which might potentiate substantial declines in adult fish  
45 populations, putting in jeopardy the species fitness under a changing ocean.

46  
47  
48  
49

50 **Introduction**

51

52 Atmospheric carbon dioxide (CO<sub>2</sub>) concentration has increased from pre-industrial levels of 280  
53  $\mu\text{atm}$  to present-day levels of 394  $\mu\text{atm}$ , and it is expected to rise up to 730-1000  $\mu\text{atm}$  by the  
54 end of the century (Caldeira and Wickett, 2003; Meehl et al., 2007). Continuous CO<sub>2</sub> uptake by  
55 world's oceans is changing the seawater chemistry and is estimated to lead to a drop of 0.4-0.5  
56 units in seawater pH (Caldeira and Wickett, 2005). Concomitantly, oceans' temperature is  
57 rising, and global sea surface temperature is expected to increase approximately 4°C by 2100  
58 (Meehl et al., 2007), leading to profound impacts on marine ecosystems. In fact, the predictable  
59 rapid rate of climate change will induce thermal stress to coastal marine biota as their thermal  
60 tolerance limits are reached or even exceeded. Beyond a certain thermal limit, biological  
61 processes such as metabolism, growth, feeding, reproduction and behavior may be affected  
62 (Carmona-Osalde et al., 2004; Portner and Knust, 2007; Nilsson et al., 2009; Byrne, 2011;  
63 Pimentel et al., 2012; Rosa et al., 2012), thus compromising the overall fitness and survival of  
64 the species. Additionally, under higher temperatures, marine organisms are likely more  
65 vulnerable to other environmental stressors such as ocean acidification (Portner, 2008; Byrne et  
66 al., 2010; Findlay et al., 2010; Parker et al., 2010; Sheppard Brennand et al., 2010; Byrne, 2011;  
67 Rosa et al., 2013; Rosa et al., 2014).

68 Ocean acidification is considered a major threat to marine organisms as it may lead to acid-base  
69 balance disturbances, protein biosynthesis decrease, metabolic depression and growth reduction  
70 (Seibel and Walsh, 2001; Portner et al., 2004; Langenbuch et al., 2006; Rosa and Seibel, 2008;  
71 Baumann et al., 2012). Exposure to elevated CO<sub>2</sub> particularly affects calcifying organisms (Orr  
72 et al., 2005; Dupont et al., 2008; Fabry et al., 2008; Talmage and Gobler, 2010), although  
73 detrimental effects on survival, growth and respiratory physiology of non-calcifying marine  
74 animals have also been observed (Seibel and Walsh, 2001; Rosa and Seibel, 2008; Munday et  
75 al., 2009b).

76 Fish have developed an effective acid-base regulatory mechanism, which allows them to  
77 accumulate bicarbonate and exchange ions across gills under hypercapnic conditions (Portner et  
78 al., 2005; Ishimatsu et al., 2008; Melzner et al., 2009). While this is true for adult organisms,  
79 early life stages may not benefit from it, as they lack well-developed and specialized ion-  
80 regulatory mechanisms to regulate and maintain their internal ionic environment (Morris, 1989;  
81 Sayer et al., 1993). Therefore, early life stages are expected to be the most vulnerable to ocean  
82 climate change-related conditions and their eventual inability to cope and adapt may constitute a  
83 bottleneck for species persistence in a changing ocean (Bauman et al., 2011; Fromell et al.,  
84 2012). Until now, only a few studies have scrutinized the impact of ocean climate change on  
85 fish larvae performance. While some report negligible effects of ocean acidification on fish  
86 larvae (Munday et al. 2011b; Hurst et al., 2012; Harvey et al., 2013; Hurst et al., 2013; Maneja

87 et al., 2013), others demonstrate that ocean warming and acidification may have a direct impact  
88 on embryonic development, larval growth, metabolism, behavior and survival (Bauman et al.,  
89 2011; Franke and Clemmesen, 2011; Frommel et al., 2012; Bignami et al., 2013; Pimentel et al.,  
90 2014). More recently, it has also been shown that larval otoliths can be affected by changes in  
91 the seawater carbonate chemistry (Checkley et al., 2009; Munday et al., 2011a; Bignami et al.,  
92 2013), but the impact of hypercapnia on larval fish skeletogenesis still remains unclear.

93 In the present study, we investigated how the combined effect of warming (+4°C) and high  
94  $p\text{CO}_2$  (0.16%  $\text{CO}_2$ ;  $p\text{CO}_2 = \sim 1600 \mu\text{atm}$ ;  $\Delta\text{pH} = 0.5$ ) affects the hatching success, larval  
95 survival, growth, metabolic rates, thermal tolerance limits and skeletogenesis of early life stages  
96 of a flatfish, *Solea senegalensis*, with major commercial importance. This teleost fish is an  
97 environmentally resilient species that inhabits the Western Iberian Upwelling Ecosystem, the  
98 northern limit of the Canary Current Upwelling System, one of the four major eastern boundary  
99 currents of the world, where  $p\text{CO}_2$  levels may reach up to  $\sim 500 \mu\text{atm}$  (AlvarezSalgado et al.,  
100 1997; Perez et al., 1999; Borges and Frankignoulle, 2002). Thus, organisms inhabiting such  
101 upwelling ecosystem are commonly exposed to seasonal high  $p\text{CO}_2$  events, due to the  
102 emergence of deep hypercapnic water masses. In these regions, the future  $p\text{CO}_2$  levels are thus  
103 expected to exceed the forecasted 1000  $\mu\text{atm}$  for 2100 (Meehl et al., 2007).

104

## 105 **Results**

106

### 107 *Hatching success, larval growth and survival*

108 The impact of high  $p\text{CO}_2$  and environmental warming on the hatching success, survival, length  
109 and growth of *S. senegalensis* larvae is shown in Figure 1 (see also Supplementary Table 1).  
110 Warming had a negative impact on the hatching success of sole larvae ( $p < 0.05$ ), but not  
111 hypercapnia ( $p > 0.05$ ) neither the interaction factor between them ( $p > 0.05$ ). The hatching rates  
112 decreased from  $86.7 \pm 5.8\%$  at the present-day scenario to  $70.0 \pm 10.0\%$  under the future  
113 hypercapnic and warming conditions (Fig. 1a).

114 Survival rates of 30 dph larvae were also significantly affected (Fig. 1b). Both temperature and  
115  $p\text{CO}_2$  had a significant effect ( $p < 0.001$ ) on survivorship, which decreased from  $45.7 \pm 1.9\%$   
116 under control conditions to  $32.7 \pm 2.6\%$  in the future scenario. However, the interaction of both  
117 variables was not significant ( $p > 0.05$ ). The mean length of 30 dph larvae under control  
118 conditions was  $13.2 \pm 1.5 \text{ mm}$  (Fig. 1c). Larval growth increased significantly with warming  
119 ( $p < 0.05$ ), but decreased significantly under acidified conditions ( $p < 0.05$ ), with an observed  
120 significant interaction effect between these two variables ( $p < 0.05$ ). Warming was responsible  
121 for increasing length by 48.6 and 46.5% under normocapnic and hypercapnic conditions,  
122 respectively. Regardless temperature, *S. senegalensis* larvae became nearly 22% smaller with  
123 increasing  $\text{CO}_2$ . As a result, the highest length value ( $19.4 \pm 1.1 \text{ mm}$ ) was observed under the

124 warming and normocapnic scenario, while the lowest length ( $10.3 \pm 0.9$  mm) was found at  
125 lower temperature and hypercapnic conditions. A quite identical trend was observed for SGR,  
126 which presented a 23.7-28.4% increase with warming and a 11.9-15.1% decrease with  
127 acidification (Fig. 1d). No significant interaction was observed between these two factors  
128 ( $p > 0.05$ ).

129

### 130 *Oxygen consumption rates, thermal sensitivity and thermal tolerance limits*

131 The effect of warming and high  $p\text{CO}_2$  on the metabolic rates and thermal tolerance limits of *S.*  
132 *senegalensis* larvae is presented in Figure 2 (see also Supplementary Table 2). Temperature had  
133 a positive effect ( $p < 0.05$ ) on oxygen consumption rates (OCR), upper thermal tolerance limits  
134 (LT50) and critical thermal maximum (CTMax), while hypercapnic conditions promoted a  
135 significant reduction ( $p < 0.05$ ) on these physiological parameters. Even so, no significant  
136 interaction was observed between these two factors ( $p > 0.05$ ). OCR of 30 dph larvae increased  
137 with temperature from  $23.1 \pm 3.2$  to  $34.8 \pm 3.5$   $\mu\text{mol O}_2 \text{ h}^{-1} \text{ g}^{-1}$  and from  $16.8 \pm 3.8$  to  $25.3 \pm 1.5$   
138  $\mu\text{mol O}_2 \text{ h}^{-1} \text{ g}^{-1}$  under normocapnic and hypercapnic conditions, respectively (Fig. 2a). These  
139 findings represent a decrease of 27.3% under acidified conditions. LT50 of 30 dph larvae  
140 increased with temperature from  $37.5 \pm 0.1$  to  $37.7 \pm 0.0^\circ\text{C}$  under normocapnia, and from  $36.1 \pm$   
141  $0.1$  to  $38.8 \pm 0.3^\circ\text{C}$  under hypercapnia conditions (Fig. 2b). CTMax of 30 dph larvae followed a  
142 similar pattern as for OCR and LT50, increasing with temperature from  $37.0 \pm 0.9$  to  $38.3 \pm$   
143  $0.5^\circ\text{C}$  under normocapnia, and from  $35.5 \pm 0.6$  to  $37.3 \pm 0.7^\circ\text{C}$  under hypercapnia conditions  
144 (Fig. 2c). Additionally, the development stage had a significant effect ( $p < 0.05$ ) over metabolic  
145 rates and thermal tolerance limits. *S. senegalensis* hatchlings presented higher OCR and lower  
146 LT50 and CTMax values, in comparison to 30 dph larvae (Fig. 2a,b,c).

147 Thermal sensitivity of *S. senegalensis* larvae between  $18^\circ\text{C}$  and  $22^\circ\text{C}$  ranged between 1.89 and  
148 2.79 (Table 1).  $Q_{10}$  values decreased under acidified conditions and increased with fish age.

149

### 150 *Skeletal deformities and otolith morphometrics*

151 Several types of skeletal anomalies were found in 30 dph *S. senegalensis* larvae (Table 2; Fig.  
152 3). Skeletal deformities consisted mainly of vertebral abnormalities, such as fusions (Fig. 3c-g),  
153 body malformations (Fig. 3c,d), and vertebral curvatures like scoliosis, lordosis and kyphosis  
154 (Fig. 3i,j). Structures such as haemal and neural spines and arches were some of the most  
155 affected structures across treatments (Fig. 3c-g).

156 Future ocean warming and high  $p\text{CO}_2$  conditions had a significant effect on the incidence of  
157 skeletal deformities in *S. senegalensis* larvae (Figs. 4 and 5; see also Supplementary Table 3).  
158 Rising temperature and  $\text{CO}_2$  levels increased the frequency of total skeletal deformities (Fig.  
159 4a), from  $70.9 \pm 2.6\%$  at the present-day scenario to  $93.2 \pm 2.7\%$  under the future conditions  
160 ( $p < 0.05$ ), an increase of 31.5%. No cranium or pectoral fin deformities were observed under

161 control temperature and  $p\text{CO}_2$  rearing conditions. Under the future scenario, caudal vertebra was  
162 the most affected region (Fig. 4d), followed by cranium (Fig. 4b), caudal fin (Fig. 4e),  
163 abdominal vertebra (Fig. 4c), pelvic fin (Fig. 4h), dorsal fin (Fig. 4f), and finally the pectoral  
164 fins (Fig. 4h). In what concerns severe skeletal deformities,  $p\text{CO}_2$  was the main factor  
165 contributing to the higher proportion of deformities observed in the future scenario (Fig. 5).  
166 Under present-day conditions, less than 1.9% of the larvae presented severe vertebral curvatures  
167 such as scoliosis (Fig. 5b) or lordosis (Fig. 5c), and no kyphotic larvae were observed (Fig. 5d).  
168 In contrast, all types of severe anomalies significantly increased ( $p < 0.05$ ) with future  
169 environmental predictions, especially with high  $p\text{CO}_2$ . The interaction factor between  
170 temperature and  $p\text{CO}_2$  did not have a significant effect ( $p > 0.05$ ) on the incidence of skeletal  
171 deformities (including the severe ones), except for abdominal vertebra and dorsal fin  
172 deformities.

173 Otolith size was also greatly affected by future warming and hypercapnia conditions (Fig. 6; see  
174 also Supplementary Table 1). *S. senegalensis* larvae experienced a 109.3% increase in otolith  
175 area with increasing temperature and  $p\text{CO}_2$  ( $p < 0.05$ ). Otolith area increased from  $1063.6 \pm$   
176  $398.8 \text{ mm}^2$  at the present-day conditions to  $1994.5 \pm 234.5 \text{ mm}^2$  under warming, and then to  
177  $2226.2 \pm 187.0 \text{ mm}^2$  under the combined effect of rising temperature and  $p\text{CO}_2$ . The interaction  
178 of both factors was however not significant ( $p > 0.05$ ).

179

## 180 Discussion

181

182 The future predictions of ocean warming and acidification revealed to have a negative impact on  
183 several aspects of the early ontogeny of the environmentally resilient flatfish *S. senegalensis*.  
184 Despite the short embryonic development time of this species (less than 2 days), the warming  
185 experienced during egg incubation was enough to elicit a negative effect on hatching success.  
186 Hatching rates decreased 16.7 percentage points with warming and acidification, in comparison  
187 to the present-day conditions. Moreover, the high temperature and  $p\text{CO}_2$  levels had a further  
188 negative effect on larval survival, representing a decrease of 28.4 percentage points in relation  
189 to the present scenario.

190 As expected, larval growth greatly increased with warming. Increased temperature was  
191 responsible for increasing length by 46.5-48.6%. Nevertheless, it is important to keep in mind  
192 that this increment does not reflect differences in size at a specific stage of development, as  
193 development is accelerated at higher temperatures. In contrast, larval growth decreased under  
194 high  $p\text{CO}_2$  levels. Contrary to some studies that have shown that larvae can become bigger  
195 under high  $p\text{CO}_2$  conditions (Munday et al., 2009a; Hurst et al., 2012; Hurst et al., 2013), *S.*  
196 *senegalensis* larvae have become almost 25% smaller with increasing  $p\text{CO}_2$ .

197 A quite identical trend was observed for larval metabolic rates and thermal tolerance limits.  
198 While temperature had a positive effect on OCR (within normal  $Q_{10}$  values) and thermal  
199 tolerance limits, hypercapnic conditions triggered a significant reduction on such physiological  
200 parameters. Additionally, and as expected, mass-specific metabolic rates decreased with  
201 development, while thermal tolerance limits revealed an opposite ontogenetic trend, i.e., older  
202 larvae revealed higher thermal tolerance limits than newly-hatched ones. We presume that  
203 exposure to higher  $p\text{CO}_2$  might have impaired the acid–base balance regulation, which directly  
204 affects the efficiency of cellular activities (Portner et al., 2005; Perry and Gilmour, 2006) and  
205 may cause deleterious effects on larval physiology and growth.

206 Faster growth at higher temperatures could have some advantages, since slower growing larvae  
207 are potentially more vulnerable to predators and may thus experience greater mortalities  
208 (Anderson, 1988). Nevertheless, growth enhancement with temperature might also present some  
209 disadvantages, since faster larval growth was accompanied by an increase in the incidence of  
210 skeletal deformities. Indeed, temperature is known to be one of the most important  
211 environmental factors that can induce morphological deformities during fish development  
212 (Aritaki and Seikai, 2004; Georgakopoulou et al., 2010; Dionisio et al., 2012). Additionally, pH  
213 may also affect the prevalence of fish skeletal deformities (Lall and Lewis-McCrea, 2007).  
214 Although fish skeleton is predominantly composed by calcium phosphate (in the form of  
215 hydroxyapatite and cartilaginous material) (Lall and Lewis-McCrea, 2007), additional buffering  
216 of tissue pH with bicarbonate and non-bicarbonate ions is expected by acidified conditions,  
217 which may interfere with larval skeletal development. In this study, the future warming and  
218 high  $p\text{CO}_2$  scenario was responsible for increasing the incidence of total skeletal deformities by  
219 22.2 percentage points, affecting 93.1% of the larvae. Moreover, high  $p\text{CO}_2$  was the main  
220 responsible for the increase of severe skeletal deformities in flatfish larvae. Under the present-  
221 day conditions, less than 1.9% of the larvae presented vertebral curvature deformities such as  
222 scoliosis or lordosis, and no kyphotic larvae were observed. In contrast, more than 50% of the  
223 larvae under the future environmental scenario presented vertebral curvature deformities. These  
224 findings are however in disagreement with a recent study that found no effects of  $\text{CO}_2$  on the  
225 skeletal development of a reef fish (Munday et al., 2011b).

226 The higher incidence of malformations under the future scenario should however be carefully  
227 interpreted. The high percentage of skeletal deformities found in *S. senegalensis* under control  
228 temperature and  $p\text{CO}_2$  conditions ( $70.9 \pm 2.7\%$ ), although similar to the values commonly found  
229 for this species under intensive rearing conditions (Fernandez et al., 2009; Dionisio et al., 2012),  
230 may indicate that fish were potentially stressed in captivity and would, therefore, be more  
231 susceptible to the negative effects of higher temperature and  $\text{CO}_2$  levels. Nevertheless, this fact  
232 does not exclude the amplifying effect that warming and hypercapnia had on the incidence of  
233 skeletal deformities. Even though the increase may be overestimated, the higher rate of



234 malformations in captive larvae under high temperature and  $p\text{CO}_2$  conditions may provide an  
235 insight of how future warming and acidification may impact the development of wild flatfish  
236 larvae and their future performance in a changing ocean.  
237 Skeletal deformities may impair the ecophysiological performance of fish larvae in many  
238 different ways. Vertebral curvatures and fin deformities may affect larval swimming behavior,  
239 feeding efficiency and the capacity to maintain their position in a current (Powell et al., 2009).  
240 Additionally, larvae with cranium deformities, such as ocular migration anomalies, probably  
241 will have their capability to feed, attack prey and avoid predators affected. Larvae with  
242 operculum deformities may increase gill's susceptibility to fungus, bacteria and amoebic  
243 parasitic infections (Powell et al., 2008) and, as a result, their swimming and cardiovascular  
244 performance might be compromised (Powell et al., 2008; Lijalad and Powell, 2009; Powell et  
245 al., 2009). Additionally, fish with dental, premaxilar or maxilar deformities cannot adduct their  
246 mandible and, besides having potential feeding restrictions, the buccal-opercular pumping of  
247 water across gills is also likely to be impaired and compromised (Lijalad and Powell, 2009).  
248 In addition to skeletal deformities, *S. senegalensis* larvae under this future climate change  
249 scenario will also be affected by changes in otolith size. *S. senegalensis* larvae experienced a  
250 109.3% increase in otolith area with rising temperature and  $p\text{CO}_2$ . Although otoliths are  
251 calcified structures composed of aragonite-protein bilayers, recent studies revealed that pH  
252 regulation in otolith endolymph may lead to increased precipitation of calcium carbonate in  
253 otoliths of fingerlings exposed to elevated  $\text{CO}_2$  (Checkley et al., 2009; Munday et al. 2011a;  
254 Bignami et al., 2013). However, this is not a rule among fishes. In at least one coral reef fish  
255 species, otolith size was not affected by exposure to elevated  $p\text{CO}_2$  (Munday et al., 2011b).  
256 Otoliths are used by fish to sense orientation, acceleration, perception, and to maintain postural  
257 equilibrium. Thus, changes in otolith size may have implications for their ecological  
258 performance, behavior and individual fitness (Gagliano et al., 2008; Bignami et al., 2013).  
259 In conclusion, the results presented in our study provide a comprehensive insight about the  
260 combined effects of ocean warming and hypercapnia conditions on *S. senegalensis* larval  
261 development. Fish larval stages represent a critical life phase for species ecological success.  
262 Therefore, climate change-related impairments in metabolism, thermal tolerance, growth,  
263 skeletal development and survival may lead to substantial declines in adult populations, putting  
264 in jeopardy the species persistence under a climate change scenario.

265

## 266 **Material and Methods**

267

### 268 *Egg collection and incubation*

269 *S. senegalensis* eggs were obtained from a wild-caught broodstock of 4 females and 2 males,  
270 under natural spawning conditions at IPMA, Estação Piloto de Piscicultura de Olhão (CRIP Sul,



271 Olhão, Portugal), during June 2012. After collection, eggs were transported and immediately  
272 transferred, under environmental controlled conditions, to the aquaculture facilities in  
273 Laboratório Marítimo da Guia (Cascais, Portugal). To estimate the potential physiological  
274 responses of early life stages to climate change, *S. senegalensis* eggs and larvae were acclimated  
275 for one month at: i) 18°C - control temperature, the mean sea surface temperature in summer  
276 (sSST) and normocapnia (0.04% CO<sub>2</sub>; *p*CO<sub>2</sub> = ~400 µatm); ii) 18°C and hypercapnia (0.16%  
277 CO<sub>2</sub>; *p*CO<sub>2</sub> = ~1600 µatm; Δ*p*H = 0.5); iii) 22°C - the future sSST warming scenario for the  
278 western coast of Portugal in 2100 (+ 4°C above the average summer sea surface temperature,  
279 Meehl et al., 2007) and normocapnia; and iv) 22°C and hypercapnia. Prior to releasing the eggs  
280 in the rearing tanks, a 2-hour thermal and chemical acclimation was performed.

281 Eggs and larvae were reared in 12 individual recirculating systems (i.e., 3 systems per  
282 treatment), filled with filtered (series of 20, 10, 5 and 0.35 µm) and UV-irradiated natural  
283 seawater. Each system comprised a 19 L cylindrical shaped tank (larval rearing tank) connected  
284 to a 100 L sump. All rearing tanks were placed inside 400 L water bath tanks (see  
285 Supplementary Figure 1), where temperatures (18.0 ± 0.2°C and 22.0 ± 0.2°C) were  
286 maintained and controlled via seawater chillers (HC-1000A, Hailea, Guangdong, China), in  
287 order to ensure thermo-controlled conditions.

288 Photoperiod was set at 14 L: 10 D (light:dark cycle). Water filtration was performed through  
289 mechanical (glass wool), physical (protein skimmer, Schuran, Jülich, Germany) and biological  
290 (ourico® bioballs, Fernando Ribeiro, Portugal) filters, as well as UV sterilization (TMC,  
291 Chorleywood, UK). Throughout the experiment, ammonia and nitrite levels were daily  
292 monitored and kept below detectable levels. Temperatures were controlled via seawater chillers  
293 (Frimar, Fernando Ribeiro, Portugal), while pH was adjusted automatically via a Profilux  
294 system (GHL, Kaiserslautern, Germany) connected to pH probes (WaterTech pH 201S) in the  
295 rearing tanks and to a standard solenoid valve system connected to a CO<sub>2</sub> tank. Any seawater  
296 pH modifications initiated CO<sub>2</sub> addition (if the pH increased) or CO<sub>2</sub> filtered air injection (if the  
297 pH decreased), until pH returned to the set value. Additionally, temperature and pH were daily  
298 controlled using a digital thermometer (Ebro thermometer TFX430) and a portable pH meter  
299 (SevenGo pro<sup>TM</sup> SG8, Mettler Toledo). Average values were 18.0 ± 0.2°C and 22.0 ± 0.2°C for  
300 temperature and 8.02 ± 0.05 and 7.51 ± 0.05 for pH. Salinity was kept at 35.4 ± 0.4. Seawater  
301 carbonate system speciation (Table 3) was calculated weekly from total alkalinity (determined  
302 according to (Sarazin et al., 1999) and pH measurements. Bicarbonate and *p*CO<sub>2</sub> values were  
303 calculated using the CO2SYS program (Lewis and Wallace, 1998), with dissociation constants  
304 from (Mehrbach et al., 1973) as refitted by Dickson and Millero (1987).

305

306 *Larval rearing*

307 Newly-hatched larvae were randomly placed into rearing tanks (19 L volume each), at a  
308 stocking density of 70 larvae per liter. All larvae were reared until 30 days post hatching (dph)  
309 under the different experimental conditions. Feeding schedule was based on larval development  
310 at each experimental condition. Larvae opened the mouth around 2 dph and started to feed on  
311 rotifers, *Brachionus plicatilis*, at a density of 5 to 10 rotifer ml<sup>-1</sup>. Live enriched (AlgaMac-3050)  
312 *Artemia metanauplii* were introduced at 5 dph and their proportion was gradually increased  
313 from 0.5 to 12 metanauplii ml<sup>-1</sup>, becoming the only prey offered at 8 dph. Frozen metanauplii  
314 were also introduced as feed after larval settlement.

315

#### 316 *Hatching success, larval growth and survival*

317 The hatching success was analyzed in small rearing boxes placed inside the rearing tanks (one  
318 per rearing system). In the beginning of the experiment, a total of 10 eggs (per box) were  
319 randomly placed inside each of the 12 boxes (3 per treatment), and were followed throughout  
320 the embryonic development. The hatching success was calculated as the percentage of eggs that  
321 hatched to normal larvae.

322 At 0 and 30 dph, 20 larvae per tank (60 larvae per treatment) were randomly sampled and their  
323 standard length was measured from the anterior extremity to the urostyle flexion, by means of  
324 stereoscopic microscope observations (Leica S6D, Leica Microsystems). The standard length of  
325 newly-hatched larvae was 2.57 ± 0.13 mm. The specific embryonic growth rate (SGR) was  
326 calculated as:

$$327 \text{SGR} = \frac{(\ln \text{embryo size } (T2) - \ln \text{embryo size } (T1))}{\text{number of days elapsed between } T1 \text{ and } T2} \times 100.$$

328 The survival rate was calculated as the percentage of surviving fish by the end of the  
329 experiment, with respect to the number of larvae at the beginning of the trial minus those  
330 individuals removed for sampling.

331

#### 332 *Oxygen consumption rates, thermal sensitivity and thermal tolerance limits*

333 Oxygen consumption measurements were determined according to previously established  
334 methods (Pimentel et al. 2012; Rosa et al., 2012). Nine newly-hatched (0 dph) and nine 30 dph  
335 larvae were incubated at each of the four treatment conditions, in sealed water-jacketed  
336 respirometry chambers (RC300 Respiration cell, Strathkelvin Instruments limited, North  
337 Lanarkshire, Scotland) containing 0.35-µm filtered and UV-irradiated seawater mixed with  
338 antibiotics (50 mg L<sup>-1</sup> streptomycin), in order to avoid bacterial respiration. Water volumes were  
339 adjusted in relation to animal mass (up to 10 mL) in order to minimize locomotion and stress  
340 but still allow for spontaneous and routine activity of the hatchlings. Controls (blanks) were  
341 used to correct for possible bacterial respiratory activity. Respiration chambers were immersed  
342 in water baths (Lauda, Lauda-Königshofen, Germany) to control temperature. Oxygen

343 concentrations were recorded with Clarke-type O<sub>2</sub> electrodes connected to a multi-channel  
344 oxygen interface (Model 928, Strathkelvin Instruments limited, North Lanarkshire, Scotland).  
345 The duration of respiratory runs varied between 3 to 6 h. Thermal sensitivity (Q<sub>10</sub>) was  
346 determined using the standard equation:

$$347 \quad Q_{10} = \frac{R(T_2)^{\frac{10}{T_2 - T_1}}}{R(T_1)},$$

348 where  $R(T_1)$  and  $R(T_2)$  represent the oxygen consumption rates at temperatures  $T_1$  and  $T_2$ ,  
349 respectively.

350 Upper thermal tolerance limits were determined based on previously established methods  
351 (Stillman and Somero, 2000). In brief, 0 and 30 dph larvae were incubated in glass containers  
352 with approximately 100 mL of 0.35- $\mu$ m filtered and UV-irradiated seawater collected from the  
353 rearing tanks. Each container was stocked with 20 specimens, and a total of 3 containers were  
354 used per experimental treatment. These glass containers were suspended in a temperature  
355 regulated water bath that was controlled to the nearest 0.1°C. Water bath temperature was set to  
356 the acclimation temperature and maintained for 30 min. Thereafter, temperature was increased  
357 at a rate of 1°C/30 min. Seawater was aerated by means of an air stone and the temperature in  
358 each container was checked with thermocouple probes. Every 30 min, if no responsiveness was  
359 noticed, the specimen was considered to be dead. The percentage of live individuals at each  
360 temperature was calculated, and then transformed by the arcsine square root function and  
361 expressed in radians. Linear-regression analysis was then used to find the slope of the line, and  
362 the temperature at which 50% of the organisms had died (0.785 radians) was calculated. This  
363 was used as a measure of upper thermal tolerance limits and referred to as the LT50. Critical  
364 thermal maximum (CTMax) was calculated using the equation:

$$365 \quad CTMax = \frac{\sum T_{\text{end-point } n}}{n},$$

366 where T end-point is the temperature at which the end-point was reached for individual 1,  
367 individual 2, individual n, divided by the n individuals that were in the sample.

368

### 369 *Skeletal deformities and otolith morphometrics*

370 To identify and quantify larval skeletal deformities, 20 larvae per rearing tank (60 larvae per  
371 treatment) were randomly sampled and fixed in 4% (v/v) buffered paraformaldehyde for 24 h  
372 and then transferred to 70% ethanol until double stained. Larvae were stained for bone and  
373 cartilage using a modification of the method described by Walker and Kimmel (2007), and  
374 observed under a stereoscopic microscope (Leica S6D, Leica Microsystems), in order to identify  
375 skeletal deformities. Skeletal deformities were defined according to previously established  
376 methods (Wagemans et al., 1998; Gavaia et al., 2002; Deschamps et al., 2008; Fernandez et al.,  
377 2009; Dionisio et al., 2012). Deformities were divided into several categories according to the  
378 affected structure (e.g., cranium, abdominal vertebra, caudal vertebra, caudal fin, dorsal fin,

379 pectoral fin and pelvic fin), and are described in Table 2. Skeletal deformities such as scoliosis,  
380 lordosis, kyphosis, multiple vertebral fusions or more than three anomalies per individual were  
381 considered severe deformities. Skeletal deformities were quantified as the percentage of fish  
382 exhibiting a specific deformity.

383 In order to analyze otolith area, 20 larvae per rearing tank (60 larvae per treatment) were  
384 randomly selected, measured and preserved in absolute ethanol. The left and right sagittal  
385 otoliths of each individual were removed and photographed under a stereoscopic microscope  
386 (Leica S6D, Leica Microsystems). Otolith area was measured using the ImageJ program®.  
387 Otolith area was calculated as the mean of the right and left otoliths, and normalized to fish  
388 length.

389

### 390 *Statistical analysis*

391 ANOVA was used to test for significant differences between the tanks of each experimental  
392 treatment. Since no differences were found between tanks, all the samples from the same  
393 treatment were pooled and analyzed together. Two-way ANOVA were then conducted in order  
394 to detect significant differences in hatching success, larval survival, standard length, SGR,  
395 skeletal deformities and otolith size between temperature and  $p\text{CO}_2$  treatments. Three-way  
396 ANOVA were applied to detect significant differences in OCR, LT50 and CTMax between  
397 temperature and  $p\text{CO}_2$  treatments and development stage (0 and 30 dph). Subsequently, post-  
398 hoc Tukey HSD tests were performed. All statistical analyses were performed for a significance  
399 level of 0.05, using Statistica 10.0 software (StatSoft Inc., Tulsa, USA).

400

### 401 **Acknowledgements**

402

403 We would like to thank CRIP Sul for supplying fish eggs, and to Oceanário de Lisboa and  
404 Aquário Vasco da Gama for supplying rotifers and microalgae. We also thank Lloyd Trueblood  
405 for helpful suggestions and critically reviewing the manuscript. The Portuguese Foundation for  
406 Science and Technology (FCT) supported this study through doctoral grants to MSP  
407 (SFRH/BD/81928/2011) and GD (SFRH/BD/73205/2010), a post-doc grant  
408 (SFRH/BPD/79038/2011) to FF and project grant to RR (PTDC/AAG-GLO/3342/2012).

409

### 410 **Author contributions**

411

412 R.R. designed the experiment; M.S.P. and F.F. performed the experiment; M.S.P., F.F., G.D.,  
413 T.R., P.P., J.M. and R.R. analyzed data; M.S.P., F.F. and R.R. wrote the main paper. All authors  
414 discussed the results and their implications, and commented on the manuscript at all stages.

415

416 **References**

417

- 418 **AlvarezSalgado, X. A., Castro, C. G., Perez, F. F. and Fraga, F.** (1997). Nutrient  
419 mineralization patterns in shelf waters of the Western Iberian upwelling. *Cont. Shelf Res.* **17**,  
420 1247-1270.
- 421 **Anderson, J. T.** (1988). A review of size dependent survival during pre-recruit stages of fishes  
422 in relation to recruitment. *J. Northw. Atl. Fish. Sci.* **8**, 55-56.
- 423 **Aritaki, M. and Seikai, T.** (2004). Temperature effects on early development and occurrence  
424 of metamorphosis-related morphological abnormalities in hatchery-reared brown sole  
425 *Pseudopleuronectes herzensteini*. *Aquaculture* **240**, 517-530.
- 426 **Baumann, H., Talmage, S. C. and Gobler, C. J.** (2012). Reduced early life growth and  
427 survival in a fish in direct response to increased carbon dioxide. *Nature Clim. Change* **2**, 38-41.
- 428 **Bignami, S., Sponaugle, S. and Cowen, R. K.** (2013). Response to ocean acidification in  
429 larvae of a large tropical marine fish, *Rachycentron canadum*. *Glob. Change Biol.* **19**, 996-1006.
- 430 **Borges, A. V. and Frankignoulle, M.** (2002). Distribution of surface carbon dioxide and air-sea  
431 exchange in the upwelling system off the Galician coast. *Global Biogeochem. CY.* **16**.
- 432 **Byrne, M.** (2011). Impact of ocean warming and ocean acidification on marine invertebrate life  
433 history stages: vulnerability and potential for persistence in a changing ocean. *Oceanogr. Mar.*  
434 *Biol.* **49**, 1-42.
- 435 **Byrne, M., Soars, N., Selvakumaraswamy, P., Dworjanyn, S. A. and Davis, A. R.** (2010).  
436 Sea urchin fertilization in a warm, acidified and high pCO<sub>2</sub> ocean across a range of sperm  
437 densities. *Mar. Environ. Res.* **69**, 234-239.
- 438 **Caldeira, K. and Wickett, M. E.** (2003). Anthropogenic carbon and ocean pH. *Nature* **425**,  
439 365-365.
- 440 **Caldeira, K. and Wickett, M. E.** (2005). Ocean model predictions of chemistry changes from  
441 carbon dioxide emissions to the atmosphere and ocean. *J. Geophys. Res.* **110**.
- 442 **Carmona-Osalde, C., Rodriguez-Serna, M., Olvera-Novoa, M. A. and Gutierrez-Yurrita,**  
443 **P. J.** (2004). Gonadal development, spawning, growth and survival of the crayfish *Procambarus*  
444 *llamasi* at three different water temperatures. *Aquaculture* **232**, 305-316.
- 445 **Checkley, D. M., Dickson, A. G., Takahashi, M., Radich, J. A., Eisenkolb, N. and Asch, R.**  
446 (2009). Elevated CO<sub>2</sub> Enhances Otolith Growth in Young Fish. *Science* **324**, 1683-1683.
- 447 **Deschamps, M. H., Kacem, A., Ventura, R., Courty, G., Haffray, P., Meunier, F. J. and**  
448 **Sire, J. Y.** (2008). Assessment of "discreet" vertebral abnormalities, bone mineralization and  
449 bone compactness in farmed rainbow trout. *Aquaculture* **279**, 11-17.
- 450 **Dickson, A. and Millero, F.** (1987). A comparison of the equilibrium constants for the  
451 dissociation of carbonic acid in seawater media. *Deep-Sea Res.* **34**, 1733-1743.
- 452 **Dionisio, G., Campos, C., Valente, L. M. P., Conceicao, L. E. C., Cancela, M. L. and**  
453 **Gavaia, P. J.** (2012). Effect of egg incubation temperature on the occurrence of skeletal  
454 deformities in *Solea senegalensis*. *J. Appl. Ichthyol.* **28**, 471-476.
- 455 **Dupont, S., Havenhand, J., Thorndyke, W., Peck, L. and Thorndyke, M.** (2008). Near-  
456 future level of CO<sub>2</sub>-driven ocean acidification radically affects larval survival and development  
457 in the brittlestar *Ophiothrix fragilis*. *Mar. Ecol. Prog. Ser.* **373**, 285-294.
- 458 **Fabry, V. J., Seibel, B. A., Feely, R. A. and Orr, J. C.** (2008). Impacts of ocean acidification  
459 on marine fauna and ecosystem processes. *Ices Mar. Res.* **65**, 414-432.
- 460 **Fernandez, I., Pimentel, M. S., Ortiz-Delgado, J. B., Hontoria, F., Sarasquete, C., Estevez,**  
461 **A., Zambonino-Infante, J. L. and Gisbert, E.** (2009). Effect of dietary vitamin A on  
462 Senegalese sole (*Solea senegalensis*) skeletogenesis and larval quality. *Aquaculture* **295**, 250-  
463 265.
- 464 **Findlay, H. S., Kendall, M. A., Spicer, J. I. and Widdicombe, S.** (2010). Relative influences  
465 of ocean acidification and temperature on intertidal barnacle post-larvae at the northern edge of  
466 their geographic distribution. *Estuar. Coast. Shelf S.* **86**, 675-682.
- 467 **Franke, A. and Clemmesen, C.** (2011). Effect of ocean acidification on early life stages of  
468 Atlantic herring (*Clupea harengus* L.). *Biogeosciences Discuss.* **8**, 3697-3707.

469 **Frommel, A. Y., Maneja, R., Lowe, D., Malzahn, A. M., Geffen, A. J., Folkvord, A.,**  
470 **Piatkowski, U., Reusch, T. B. H. and Clemmesen, C.** (2012). Severe tissue damage in  
471 Atlantic cod larvae under increasing ocean acidification. *Nature clim. Change* **2**, 42-46.  
472 **Gagliano, M., Depczynski, M., Simpson, S. D. and Moore, J. A. Y.** (2008). Dispersal without  
473 errors: symmetrical ears tune into the right frequency for survival. *Proc. R. Soc. Lond. B Biol.*  
474 *Sci.* **275**, 527-534.  
475 **Gavaia, P. J., Dinis, M. T. and Cancela, M. L.** (2002). Osteological development and  
476 abnormalities of the vertebral column and caudal skeleton in larval and juvenile stages of  
477 hatchery-reared Senegal sole (*Solea senegalensis*). *Aquaculture* **211**, 305-323.  
478 **Georgakopoulou, E., Katharios, P., Divanach, P. and Koumoundouros, G.** (2010). Effect of  
479 temperature on the development of skeletal deformities in Gilthead seabream (*Sparus aurata*  
480 Linnaeus, 1758). *Aquaculture* **308**, 13-19.  
481 **Harvey, B. P., Gwynn-Jones, D. and Moore, P. J.** (2013). Meta-analysis reveals complex  
482 marine biological responses to the interactive effects of ocean acidification and warming. *Ecol.*  
483 *Evol.* **3**, 1016-1030.  
484 **Hurst, T. P., Fernandez, E. R. and Mathis, J. T.** (2013). Effects of ocean acidification on  
485 hatch size and larval growth of walleye pollock (*Theragra chalcogramma*). *Ices J. Mar. Sci.* **70**,  
486 812-822.  
487 **Hurst, T. P., Fernandez, E. R., Mathis, J. T., Miller, J. A., Stinson, C. M. and Abgeak, E.**  
488 **F.** (2012). Resiliency of juvenile walleye pollock to projected levels of ocean acidification.  
489 *Aquatic Biol.* **17**, 247-259.  
490 **Ishimatsu, A., Hayashi, M. and Kikkawa, T.** (2008). Fishes in high-CO<sub>2</sub>, acidified oceans.  
491 *Mar. Ecol. Prog. Ser.* **373**, 295-302.  
492 **Langenbuch, M., Bock, C., Leibfritz, D. and Portner, H. O.** (2006). Effects of environmental  
493 hypercapnia on animal physiology: A C-13 NMR study of protein synthesis rates in the marine  
494 invertebrate *Sipunculus nudus*. *Comp. Biochem. Physiol. A Mol. Integr. Physiol.* **144**, 479-484.  
495 **Lewis, E. and Wallace, D. W. R.** (1998). CO<sub>2</sub>SYS-Program developed for the CO<sub>2</sub> system  
496 calculations. *Carbon Dioxide Inf Anal Center, Report ORNL/CDIAC-105*.  
497 **Lijalad, M. and Powell, M. D.** (2009). Effects of lower jaw deformity on swimming  
498 performance and recovery from exhaustive exercise in triploid and diploid Atlantic salmon  
499 *Salmo salar* L. *Aquaculture* **290**, 145-154.  
500 **Maneja, R. H., Frommel, A. Y., Geffen, A. J., Folkvord, A., Piatkowski, U., Chang, M. Y.**  
501 **and Clemmesen, C.** (2013). Effects of ocean acidification on the calcification of otoliths of  
502 larval Atlantic cod *Gadus morhua*. *Mar. Ecol. Progr. Ser.* **477**, 251-258.  
503 **Meehl, G. A., Stocker, T. F., Collins, W. D., Friedlingstein, P., Gaye, A. T., Gregory, J. M.,**  
504 **Kitoh, A., Knutti, R., Murphy, J. M., Noda, A. et al.** (2007). Climate Change 2007: The  
505 Physical Science Basis. Contribution of Working Group I to the Fourth Assessment Report of  
506 the Intergovernmental Panel on Climate Change. Cambridge, United Kingdom: Cambridge  
507 University Press.  
508 **Mehrbach, C., Culberson, C., Hawley, J. and Pytkowicz, R.** (1973). Measurement of the  
509 apparent dissociation constants of carbonic acid in seawater at atmospheric pressure. *Limnol.*  
510 *Oceanogr* **18**, 897-907.  
511 **Melzner, F., Gutowska, M. A., Langenbuch, M., Dupont, S., Lucassen, M., Thorndyke, M.**  
512 **C., Bleich, M. and Portner, H. O.** (2009). Physiological basis for high CO<sub>2</sub> tolerance in  
513 marine ectothermic animals: pre-adaptation through lifestyle and ontogeny? *Biogeosciences* **6**,  
514 2313-2331.  
515 **Morris, R.** (1989). Acid Toxicity and Aquatic Animals. Cambridge, United Kingdom:  
516 Cambridge University.  
517 **Munday, P. L., Donelson, J. M., Dixon, D. L. and Endo, G. G. K.** (2009a). Effects of ocean  
518 acidification on the early life history of a tropical marine fish. *Proc. R. Soc. B.* **276**, 3275-3283.  
519 **Munday, P. L., Hernaman, V., Dixon, D. L. and Thorrold, S. R.** (2011a). Effect of ocean  
520 acidification on otolith development in larvae of a tropical marine fish. *Biogeosciences* **8**, 1631-  
521 1641.



522 **Munday, P. L., Gagliano, M., Donelson, J. M., Dixon, D. L. and Thorrold, S. R.** (2011b).  
523 Ocean acidification does not affect the early life history development of a tropical marine fish.  
524 *Mar. Ecol. Prog. Ser.* **423**, 211-221.

525 **Munday, P. L., Dixon, D. L., Donelson, J. M., Jones, G. P., Pratchett, M. S., Devitsina, G.**  
526 **V. and Doving, K. B.** (2009b). Ocean acidification impairs olfactory discrimination and  
527 homing ability of a marine fish. *Proc. Nat. Acad. Sci. U.S.A.* **106**, 1848-1852.

528 **Nilsson, G. E., Crawley, N., Lunde, I. G. and Munday, P. L.** (2009). Elevated temperature  
529 reduces the respiratory scope of coral reef fishes. *Glob. Change Biol.* **15**, 1405-1412.

530 **Orr, J. C., Fabry, V. J., Aumont, O., Bopp, L., Doney, S. C., Feely, R. A., Gnanadesikan,**  
531 **A., Gruber, N., Ishida, A., Joos, F. et al.** (2005). Anthropogenic ocean acidification over the  
532 twenty-first century and its impact on calcifying organisms. *Nature* **437**, 681-686.

533 **Parker, L. M., Ross, P. M. and O'Connor, W. A.** (2010). Comparing the effect of elevated  
534 pCO<sub>2</sub> and temperature on the fertilization and early development of two species of oysters.  
535 *Mar. Biol.* **157**, 2435-2452.

536 **Perez, F. F., Rios, A. F. and Roson, G.** (1999). Sea surface carbon dioxide off the Iberian  
537 Peninsula (North Eastern Atlantic Ocean). *J. Marine Syst.* **19**, 27-46.

538 **Perry, S. F. and Gilmour, K. M.** (2006). Acid-base balance and CO<sub>2</sub> excretion in fish:  
539 Unanswered questions and emerging models. *Respir. Physiol. Neurobiol.* **154**, 199-215.

540 **Pimentel, M., Pregado, M., Repolho, T. and Rosa, R.** (2014). Impact of ocean acidification in  
541 the metabolism and swimming behavior of the dolphinfish (*Coryphaena hippurus*) early larvae.  
542 *Mar. Biol.* **161**, 725-729.

543 **Pimentel, M. S., Trubenbach, K., Faleiro, F., Boavida-Portugal, J., Repolho, T. and Rosa,**  
544 **R.** (2012). Impact of ocean warming on the early ontogeny of cephalopods: a metabolic  
545 approach. *Mar. Biol.* **159**, 2051-2059.

546 **Portner, H. O.** (2008). Ecosystem effects of ocean acidification in times of ocean warming: a  
547 physiologist's view. *Mar. Ecol. Prog.* **373**, 203-217.

548 **Portner, H. O. and Knust, R.** (2007). Climate change affects marine fishes through the oxygen  
549 limitation of thermal tolerance. *Science* **315**, 95-97.

550 **Portner, H. O., Langenbuch, M. and Reipschlag, A.** (2004). Biological impact of elevated  
551 ocean CO<sub>2</sub> concentrations: Lessons from animal physiology and earth history. *J. Ocean.* **60**,  
552 705-718.

553 **Portner, H. O., Langenbuch, M. and Michaelidis, B.** (2005). Synergistic effects of  
554 temperature extremes, hypoxia, and increases in CO<sub>2</sub> on marine animals: From Earth history to  
555 global change. *J. Geophys. Res. Oceans.* **110**.

556 **Powell, M. D., Jones, M. A. and Lijalad, M.** (2009). Effects of skeletal deformities on  
557 swimming performance and recovery from exhaustive exercise in triploid Atlantic salmon. *Dis.*  
558 *Aquat. Org.* **85**, 59-66.

559 **Powell, M. D., Leef, M. J., Roberts, S. D. and Jonesk, M. A.** (2008). Neoparamoebic gill  
560 infections: host response and physiology in salmonids. *J. Fish. Biol.* **73**, 2161-2183.

561 **Rosa, R. and Seibel, B. A.** (2008). Synergistic effects of climate-related variables suggest  
562 future physiological impairment in a top oceanic predator. *Proc. Natl. Acad. Sci. USA.* **105**,  
563 20776-20780.

564 **Rosa, R., Pimentel, M. S., Boavida-Portugal, J., Teixeira, T., Trubenbach, K. and Diniz,**  
565 **M.** (2012). Ocean Warming Enhances Malformations, Premature Hatching, Metabolic  
566 Suppression and Oxidative Stress in the Early Life Stages of a Keystone Squid. *Plos One* **7**.

567 **Rosa, R., Trübenbach, K., Pimentel, M. S., Boavida-Portugal, J., Faleiro, F., Baptista, M.,**  
568 **Dionísio, G., Calado, R., Pörtner, H. O. and Repolho, T.** (2014). Differential impacts of  
569 ocean acidification and warming on winter and summer progeny of a coastal squid (*Loligo*  
570 *vulgaris*). *J. Exp. Biol.* **217**, 518-525.

571 **Rosa, R., Trübenbach, K., Repolho, T., Pimentel, M., Faleiro, F., Boavida-Portugal, J.,**  
572 **Baptista, M., Lopes, V. M., Dionísio, G., Leal, M. et al.** (2013). Lower hypoxia thresholds of  
573 cuttlefish early life stages living in a warm acidified ocean. *Proc. R. Soc. B.* **280**.

574 **Sarazin, G., Michard, G. and Prevot, F.** (1999). A rapid and accurate spectroscopic method  
575 for alkalinity measurements in sea water samples. *Water Res.* **33**, 290-294.



- 576 **Sayer, M. D. J., Reader, J. P. and Dalziel, T. R. K.** (1993). Fresh-water acidification effects  
577 on the early-life stages of fish. *Rev. Fish Biol. Fish.* **3**, 95-132.
- 578 **Seibel, B. A. and Walsh, P. J.** (2001). Carbon cycle - Potential, impacts of CO2 injection on  
579 deep-sea biota. *Science* **294**, 319-320.
- 580 **Sheppard Brennand, H., Soars, N., Dworjanyn, S. A., Davis, A. R. and Byrne, M.** (2010).  
581 Impact of Ocean Warming and Ocean Acidification on Larval Development and Calcification in  
582 the Sea Urchin *Tripneustes gratilla*. *Plos One* **5**.
- 583 **Stillman, J. H. and Somero, G. N.** (2000). A comparative analysis of the upper thermal  
584 tolerance limits of eastern Pacific porcelain crabs, genus *Petrolisthes*: Influences of latitude,  
585 vertical zonation, acclimation, and phylogeny. *Physiol. Biochem. Zool.* **73**, 200-208.
- 586 **Talmage, S. C. and Gobler, C. J.** (2010). Effects of past, present, and future ocean carbon  
587 dioxide concentrations on the growth and survival of larval shellfish. *Proc. Natl Acad. Sci. USA.*  
588 **107**, 17246-17251.
- 589 **Wagemans, F., Focant, B. and Vandewalle, P.** (1998). Early development of the cephalic  
590 skeleton in the turbot. *J. Fish Biol.* **52**, 166–204.

591

592

593

594 **Table 1 - Thermal sensitivity ( $Q_{10}$ ) between 18 and 22°C of 0 and 30 dph *Solea senegalensis***  
595 **larvae at normo- and hypercapnia.**

596

| Development stage | pH  | $Q_{10}$ |
|-------------------|-----|----------|
| 0 dph             | 7.5 | 1.89     |
|                   | 8.0 | 2.62     |
| 30 dph            | 7.5 | 2.77     |
|                   | 8.0 | 2.79     |

597

598

599

600

601

602

603

604

605

606

607

608

609

610

611

612

613

614

615

616

617

618

619

620

621

622

623

624 **Table 2 - Types of skeletal deformities considered in this study** (adapted from Wagemans et  
 625 al., 1998; Gavaia et al., 2002; Dionísio et al., 2012).  
 626

| Affected area       | Types of skeletal deformities        | Description                                                                    |
|---------------------|--------------------------------------|--------------------------------------------------------------------------------|
| Cranium             | Jaw deformities                      | Malformed and/or reduced maxillary, premaxillary, angular and/or dentary bones |
|                     | Ocular migration deformities         | Incomplete or non-existent ocular migration                                    |
|                     | Deformed opercle                     | Deformed opercular, ceratobranchial and ceratohyal bones                       |
| Abdominal vertebra  | Vertebral body malformation          | Torsion and/or malformation of one or more vertebrae                           |
|                     | Vertebral fusion                     | Partial or total fusion of two or more vertebrae                               |
|                     | Vertebral compression                | Partial or total compression of two or more vertebrae                          |
|                     | Malformed neural and/or haemal arch  | Deformed, absent or fused                                                      |
|                     | Malformed neural and/or haemal spine | Deformed, absent or fused                                                      |
|                     | Malformed parapophysis               | Deformed, absent, fused or supernumerary                                       |
|                     | Scoliosis                            | Side-to-side vertebral curvature                                               |
| Lordosis            |                                      | Excessive inward vertebral curvature                                           |
|                     | Kyphosis                             | Excessive outward vertebral curvature                                          |
| Caudal vertebra     | Vertebral body malformation          | Torsion and/or malformation of one or more vertebrae                           |
|                     | Vertebral fusion                     | Partial or total fusion of two or more vertebrae                               |
|                     | Vertebral compression                | Partial or total compression of two or more vertebrae                          |
|                     | Malformed neural and/or haemal arch  | Deformed, absent, asymmetric or fused                                          |
|                     | Malformed neural and/or haemal spine | Deformed, absent, asymmetric or fused                                          |
|                     | Scoliosis                            | Side-to-side vertebral curvature                                               |
|                     | Lordosis                             | Excessive inward vertebral curvature                                           |
| Caudal fin complex  | Malformed hypural                    | Deformed, absent, asymmetric, fused or supernumerary                           |
|                     | Malformed epural                     | Deformed, absent, asymmetric, fused or supernumerary                           |
|                     | Malformed parahypural                | Deformed, absent, asymmetric, fused or supernumerary                           |
|                     | Malformed fin rays                   | Deformed, absent, asymmetric, fused or supernumerary                           |
| Dorsal fin          | Malformed fin rays                   | Deformed, absent, asymmetric, fused or supernumerary                           |
|                     | Malformed pterygiophores             | Deformed, absent, fused or supernumerary                                       |
| Pectoral/pelvic fin | Malformed fin rays                   | Deformed, absent, asymmetric, fused or supernumerary                           |

627  
 628  
 629  
 630  
 631

632 **Table 3 - Seawater carbonate chemistry data for the different climate change scenarios.**

633 Total carbon ( $C_T$ ), carbon dioxide partial pressure ( $pCO_2$ ), bicarbonate concentration ( $HCO_3^-$ )

634 and aragonite saturation state of seawater ( $\Omega_{arag}$ ) were calculated with CO2SYS using salinity,

635 temperature, pH and total alkalinity ( $A_T$ ). Values are means  $\pm$  SD.

636

| Temperature      | pH              | $A_T$                                | $C_T$                                | $pCO_2$             | $HCO_3^-$                   | $\Omega_{arag}$ |
|------------------|-----------------|--------------------------------------|--------------------------------------|---------------------|-----------------------------|-----------------|
| (°C)             | (Total scale)   | [ $\mu\text{mol kg}^{-1}\text{SW}$ ] | [ $\mu\text{mol/kg}^{-1}\text{SW}$ ] | [ $\mu\text{atm}$ ] | [ $\mu\text{mol kg}^{-1}$ ] |                 |
| 22.02 $\pm$ 0.42 | 8.03 $\pm$ 0.05 | 2335.74 $\pm$ 89.09                  | 2148.20 $\pm$ 81.43                  | 424.53 $\pm$ 19.97  | 1985.25 $\pm$ 75.28         | 2.24 $\pm$ 0.08 |
| 22.12 $\pm$ 1.01 | 7.51 $\pm$ 0.05 | 2317.40 $\pm$ 36.40                  | 2314.73 $\pm$ 36.72                  | 1654.20 $\pm$ 49.06 | 2194.88 $\pm$ 34.84         | 0.78 $\pm$ 0.01 |
| 18.20 $\pm$ 0.40 | 8.02 $\pm$ 0.04 | 2305.70 $\pm$ 80.54                  | 2141.80 $\pm$ 76.78                  | 400.00 $\pm$ 66.71  | 1993.35 $\pm$ 72.21         | 1.95 $\pm$ 0.07 |
| 18.15 $\pm$ 0.29 | 7.50 $\pm$ 0.03 | 2281.07 $\pm$ 61.89                  | 2290.90 $\pm$ 62.73                  | 1607.90 $\pm$ 24.78 | 2173.55 $\pm$ 59.50         | 0.67 $\pm$ 0.02 |

637

638

639

640 **Figure captions**

641

642 **Figure 1 - Effect of ocean warming and acidification on the early stages of *Solea***  
643 ***senegalensis*.** Hatching success (n=30) (a) and survival rate (n=3) (b), standard length (n=60)  
644 (c) and specific growth rate (SGR) (n=60) (d) of 30 dph larvae at different temperature and pH  
645 scenarios. Values are given in mean  $\pm$  SD. Different letters represent significant differences  
646 between the different climate scenarios ( $p < 0.05$ ) (more statistical details in Supplementary  
647 Table 1).

648

649 **Figure 2 - Impact of ocean warming and acidification on the metabolism and thermal**  
650 **tolerance of *Solea senegalensis* larvae.** Oxygen consumption rates (OCR) (n=9) (a), upper  
651 thermal tolerance limits (LT50) (n=30) (b), and critical thermal maximum (CTMax) (n=30) (c)  
652 of 0 and 30 dph larvae (dark and light grey, respectively) at different temperature and pH  
653 scenarios. Values are given in mean  $\pm$  SD. Different letters represent significant differences  
654 between the different climate scenarios ( $p < 0.05$ ). Asterisks represent significant differences  
655 between the two developmental stages ( $p < 0.05$ ) (more statistical details in Supplementary Table  
656 2).

657

658 **Figure 3 - Skeletal deformities of 30 dph *Solea senegalensis* larvae under the effect of**  
659 **ocean warming and acidification.** Cranium deformity, ocular migration anomaly (a); opercle  
660 and cranium deformity (b); vertebra fusion and compression, deformed spines, arches and  
661 parapophysis (c); vertebra fusion and deformed spines and arches (d); vertebra fusion, urostyle  
662 fusion and caudal fin complex anomalies such as modified neural and hemal spine, hypural and  
663 fin rays (e); vertebra fusion and compression, deformed spines and arches (f); vertebral fusion,  
664 deformed hypural and modified hemal spines (g); pelvic fin deformity (h); scoliosis (i); lordosis  
665 and kyphosis (j).

666

667 **Figure 4 - Incidence of skeletal deformities in *Solea senegalensis* larvae under the effect of**  
668 **ocean warming and acidification.** Total skeletal deformities of 30 dph larvae at different  
669 temperature and pH scenarios (a), which include deformities in the cranium (b), abdominal  
670 vertebra (c), caudal vertebra (d), caudal fin complex (e), dorsal fin (f), pectoral fin (g), and  
671 pelvic fin (h). Values are given in mean  $\pm$  SD (n=60). Different letters represent significant  
672 differences between the different climate scenarios ( $p < 0.05$ ) (more statistical details in  
673 Supplementary Table 3).

674

675 **Figure 5 - Incidence of severe skeletal deformities in *Solea senegalensis* larvae under the**  
676 **effect of ocean warming and acidification.** Total severe skeletal deformities (a) and severe

677 vertebral curvatures such as lordosis (**b**), scoliosis (**c**), and kyphosis (**d**) of 30 dph larvae at  
678 different temperature and pH scenarios. Values are given in mean  $\pm$  SD (n=60). Different letters  
679 represent significant differences between the different climate scenarios (p<0.05) (more  
680 statistical details in Supplementary Table 3).

681

682 **Figure 6 - Effect of ocean warming and acidification on otolith size of 30 dph *Solea***  
683 ***senegalensis* larvae.** Otolith area at different temperature and pH scenarios. Values are given in  
684 mean  $\pm$  SD (n=60). Different letters represent significant differences between the different  
685 climate scenarios (p<0.05) (more statistical details in Supplementary Table 1).

686

687

Figure 1

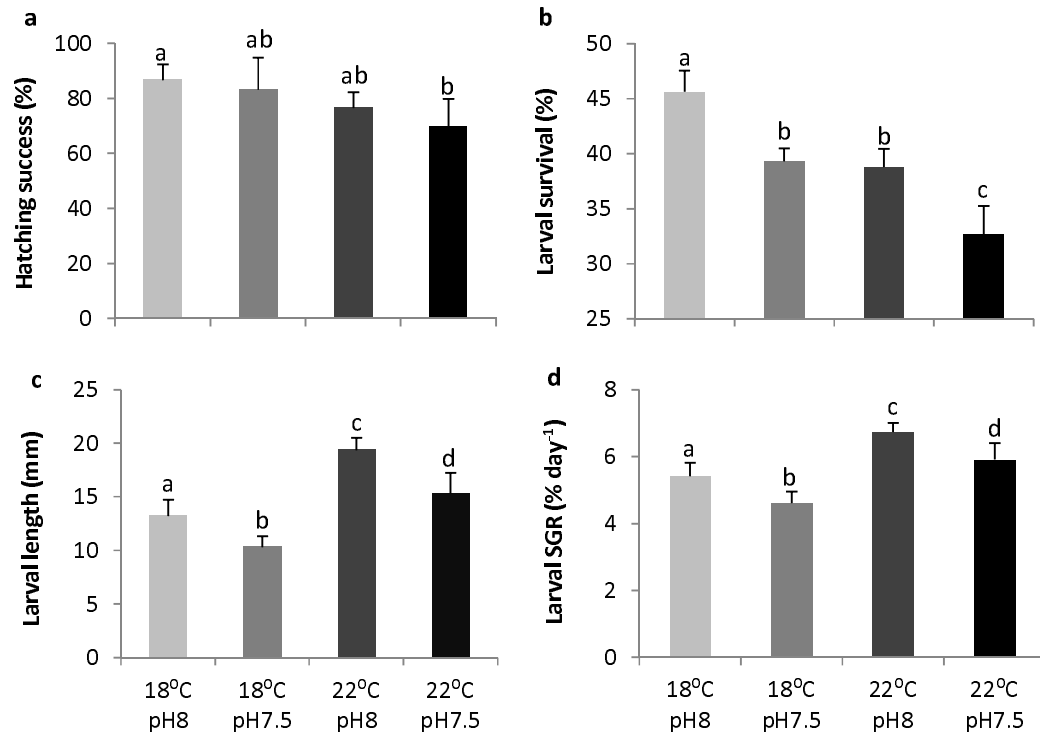



Figure 2

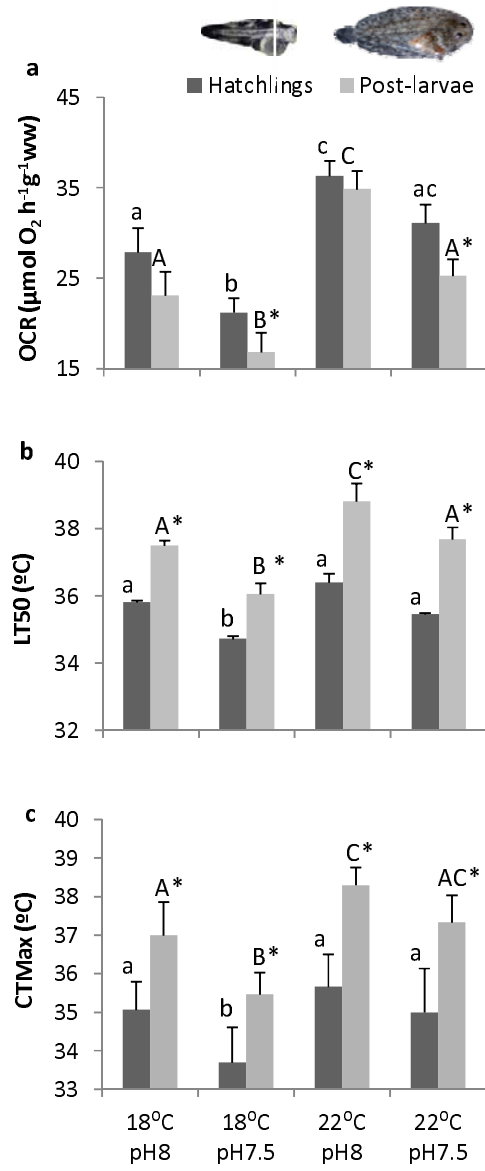

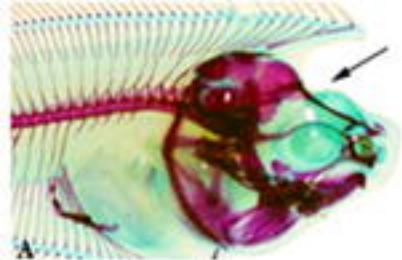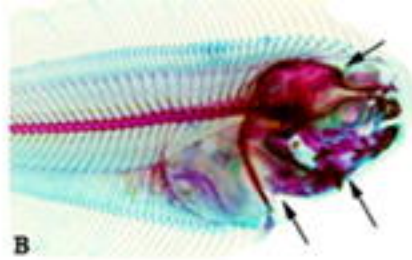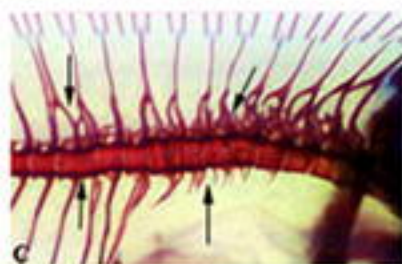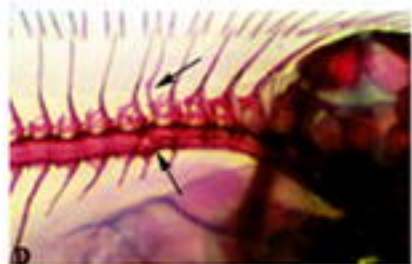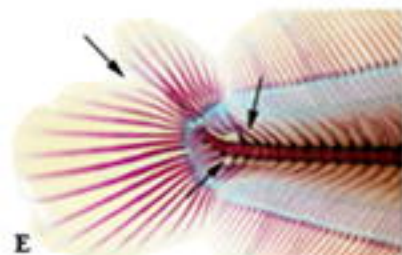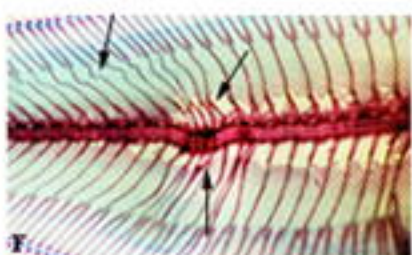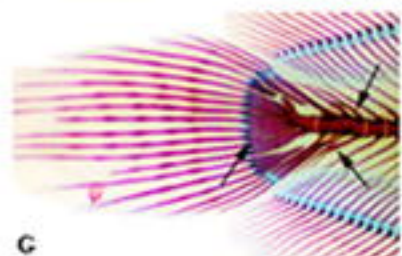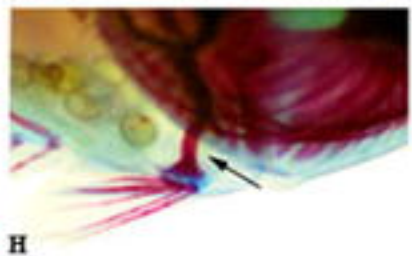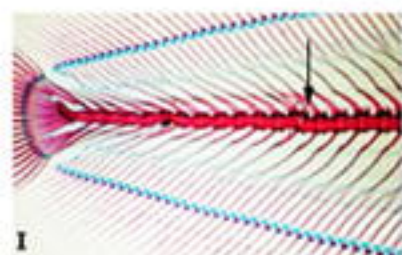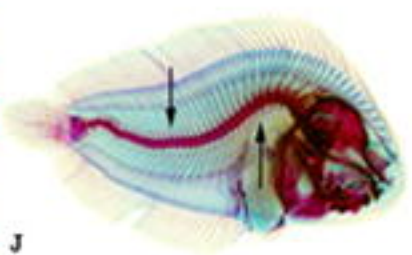

Figure 4

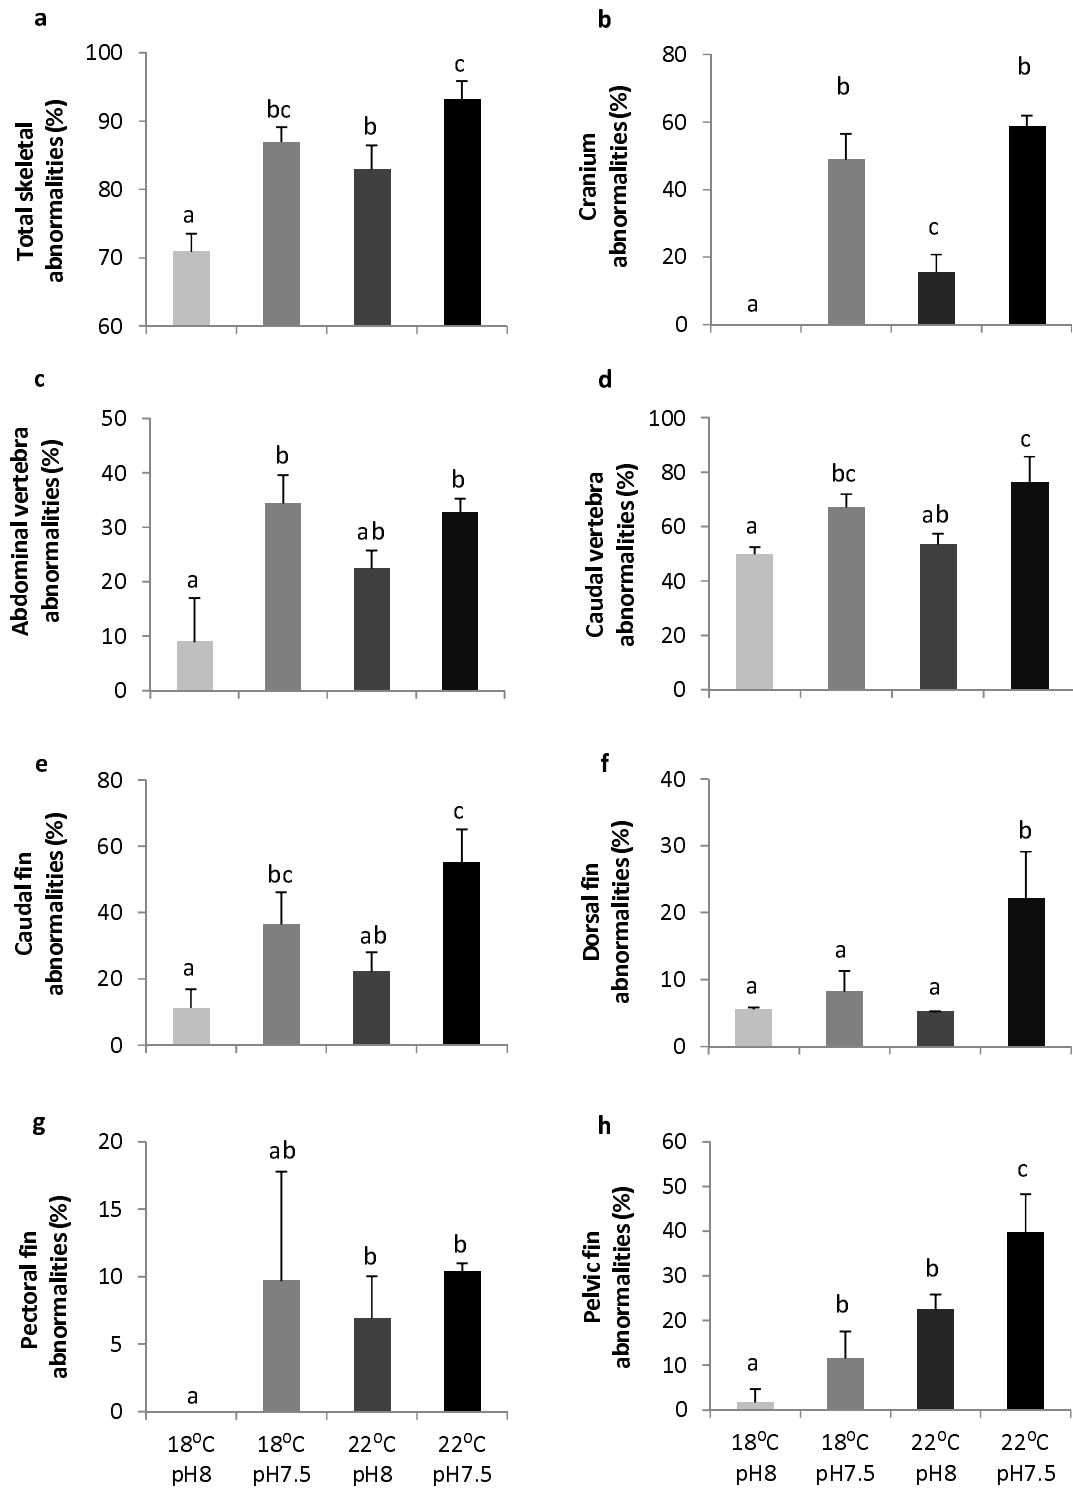

Figure 5

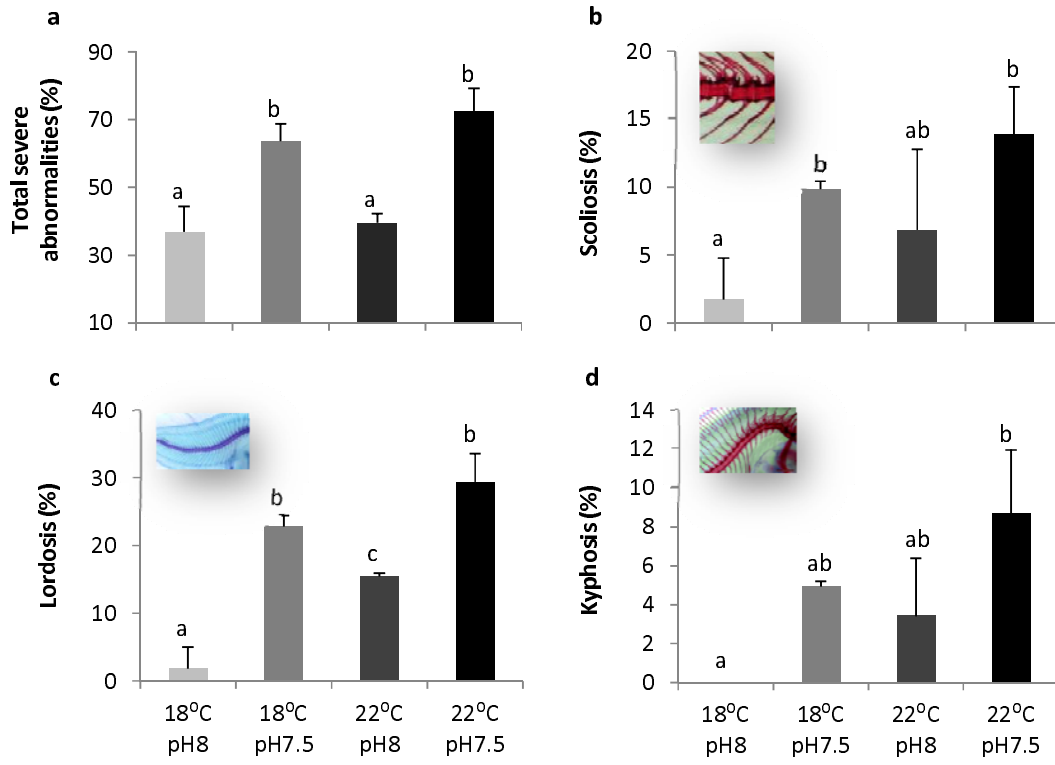

**Figure 6**

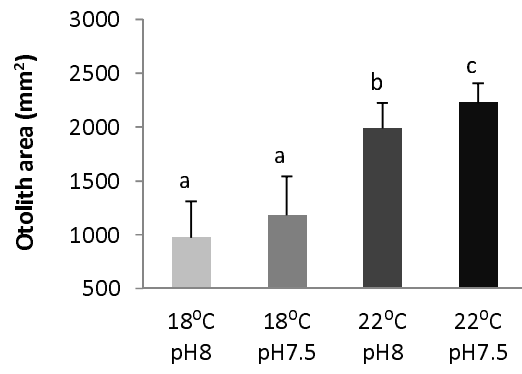

Source: https://cob.silverchair.com/jeb/article-pdf/doi/10.1242/jeb.092635/2037458/jeb_092635.pdf
